# Supplementary material for: Intracellular complement Factor H promotes tumor progression through modulation of cell cycle and actin cytoskeleton
Source: Research Square preprint supplement (doi:10.21203/rs.3.rs-5147456/v1), 2025-10-20
Supplement: Supplementary file 1 [file f2b5434ed8131bcaad2dbba7.xlsx]

## Sheet: Fig. 2D
Sample	FH O.D.
BJ Cyto	0.30642
BJ Cyto	0.352559
BJ Orga	1.62721
BJ Orga	1.72974
BJ Orga	1.71897
BJ Nuc	1.001
BJ Nuc	1.18523
BJ Nuc	0.917524

## Sheet: Fig. 3E
X axis	Y axis
FH ug/mL	CREB1	CAPZB	NARS2	TFDP2	TJP1	E2F4	E2F3	TFDP1	Pro-C1s (Neg Ctrl)	C3b (Pos Ctrl)	Non-Coated
0	0	0	0	0	0	0	0	0	0	0	0
0.5	0.0042	0.0338	0.0337	0.0052	0	0	0.0338	0.0091	0	2.0497	0
3	0.10885	0.1578	0.1498	0	0	0	0.201	0.0562	0	2.3011	0
10	0.25345	0.4148	0.3504	0	0	0.0073	0.5854	0.099	0	2.1082	0

## Sheet: Fig. 4J
Proliferation					Mortality
A498		BJ			A498		BJ
Treatment	CFSE 1/Fold Change	Treatment	CFSE 1/Fold Change		Treatment	DAPI % Fold Change	Treatment	DAPI % Fold Change
siC	0.971936	siC	0.990709		siC	0.813778	siC	1.44332
siC	0.96373	siC	0.993506		siC	1.12809	siC	0.974957
siC	1.01791	siC	0.977181		siC	1.09795	siC	1.02275
siC	1.02627	siC	1.02262		siC	0.960172	siC	0.745555
siC	1.02387	siC	1.01745		siC	1.104	siC	0.81342
siC	1.03173	siFH	0.720423		siC	1.6011	siFH	2.51386
siC	0.997512	siFH	0.652612		siC	0.884416	siFH	3.30721
siC	0.989309	siFH	0.720915		siC	0.762428	siFH	2.12197
siC	0.982843	siFH	0.711081		siC	0.648063	siFH	2.95355
siFH	0.423283	siTP53	1.30724		siFH	2.44995	siFH	2.83885
siFH	0.438557	siTP53	1.3625		siFH	2.61787	siTP53	0.753202
siFH	0.403318	siTP53	1.3718		siFH	3.60818	siTP53	0.478876
siFH	0.392759	siTP53	1.38394		siFH	2.30786	siTP53	0.547696
siFH	0.41617	siTP53	1.32613		siFH	1.76883	siTP53	0.526668
siFH	0.393009	siFH + siTP53	1.35725		siFH	1.11314	siTP53	0.637545
siFH	0.370154	siFH + siTP53	1.37314		siFH	1.26258	siFH + siTP53	0.71688
siFH	0.369358	siFH + siTP53	1.3413		siFH	1.25953	siFH + siTP53	0.695852
siFH	0.393652	siFH + siTP53	1.3718		siFH	1.104	siFH + siTP53	0.699675
siTP53	0.982853	siFH + siTP53	1.32947		siTP53	2.13132	siFH + siTP53	0.474097
siTP53	1.00122				siTP53	2.14424	siFH + siTP53	0.818199
siTP53	1.00853				siTP53	2.40258
siTP53	1.0187				siTP53	2.04521
siTP53	1.02347				siTP53	1.22293
siTP53	1.00167				siTP53	0.849344
siTP53	1.00923				siTP53	0.971333
siTP53	0.990939				siTP53	1.04605
siTP53	1.02296				siTP53	0.902714
siFH + siTP53	0.596094				siFH + siTP53	1.33046
siFH + siTP53	0.556658				siFH + siTP53	1.44241
siFH + siTP53	0.579386				siFH + siTP53	2.29064
siFH + siTP53	0.588082				siFH + siTP53	2.14855
siFH + siTP53	0.578875				siFH + siTP53	0.89204
siFH + siTP53	0.767219				siFH + siTP53	1.34492
siFH + siTP53	0.73849				siFH + siTP53	0.953034
siFH + siTP53	0.741677				siFH + siTP53	0.879841
siFH + siTP53	0.775129				siFH + siTP53	1.47301

## Sheet: Fig. 5I
Group	Ki67+ cells per 1000 cells
CA+ FH- Tumor Cells	32.1676
CA+ FH- Tumor Cells	27.2236
CA+ FH- Tumor Cells	13.4166
CA+ FH- Tumor Cells	3.27183
CA+ FH- Tumor Cells	22.7901
CA+ FH- Tumor Cells	12.4866
CA+ FH+ Tumor Cells	45.1019
CA+ FH+ Tumor Cells	51.3699
CA+ FH+ Tumor Cells	181.912
CA+ FH+ Tumor Cells	6.46915
CA+ FH+ Tumor Cells	33.5179
CA+ FH+ Tumor Cells	26.4138

## Sheet: Supp. Fig1A
Type of Sample	CFH Log2(TPM+1)
Normal Adjacent Tissue	9.35047
Normal Adjacent Tissue	9.95369
Normal Adjacent Tissue	10.9141
Normal Adjacent Tissue	8.9738
Normal Adjacent Tissue	11.9573
Normal Adjacent Tissue	9.63118
Normal Adjacent Tissue	11.7538
Normal Adjacent Tissue	11.5596
Normal Adjacent Tissue	10.0641
Normal Adjacent Tissue	9.68612
Normal Adjacent Tissue	10.3821
Normal Adjacent Tissue	11.5046
Normal Adjacent Tissue	9.8749
Normal Adjacent Tissue	9.86513
Normal Adjacent Tissue	10.1081
Normal Adjacent Tissue	10.3579
Normal Adjacent Tissue	9.84237
Normal Adjacent Tissue	12.0439
Normal Adjacent Tissue	9.29075
Normal Adjacent Tissue	10.1021
Normal Adjacent Tissue	12.9134
Normal Adjacent Tissue	11.5819
Normal Adjacent Tissue	8.15605
Normal Adjacent Tissue	11.2664
Normal Adjacent Tissue	9.86741
Normal Adjacent Tissue	11.2107
Normal Adjacent Tissue	10.3991
Normal Adjacent Tissue	10.3807
Normal Adjacent Tissue	11.4028
Normal Adjacent Tissue	10.7357
Normal Adjacent Tissue	9.61495
Normal Adjacent Tissue	10.9298
Normal Adjacent Tissue	9.7003
Normal Adjacent Tissue	9.44248
Normal Adjacent Tissue	9.85338
Normal Adjacent Tissue	9.93416
Normal Adjacent Tissue	10.9544
Normal Adjacent Tissue	10.467
Normal Adjacent Tissue	10.1058
Normal Adjacent Tissue	9.96391
Normal Adjacent Tissue	12.0702
Normal Adjacent Tissue	9.3654
Normal Adjacent Tissue	9.14322
Normal Adjacent Tissue	10.2929
Normal Adjacent Tissue	10.2989
Normal Adjacent Tissue	10.6855
Normal Adjacent Tissue	10.3207
Normal Adjacent Tissue	8.64888
Normal Adjacent Tissue	9.58007
Normal Adjacent Tissue	9.72316
Normal Adjacent Tissue	9.55398
Normal Adjacent Tissue	8.45263
Normal Adjacent Tissue	8.74615
Normal Adjacent Tissue	9.00423
Normal Adjacent Tissue	9.64138
Normal Adjacent Tissue	9.31911
Normal Adjacent Tissue	9.83892
Normal Adjacent Tissue	8.12879
Normal Adjacent Tissue	11.5539
Normal Adjacent Tissue	9.40189
Normal Adjacent Tissue	10.0356
Normal Adjacent Tissue	8.93277
Normal Adjacent Tissue	10.0483
Normal Adjacent Tissue	9.83879
Normal Adjacent Tissue	11.0579
Normal Adjacent Tissue	10.1936
Normal Adjacent Tissue	10.4575
Normal Adjacent Tissue	11.8138
Normal Adjacent Tissue	9.83345
Normal Adjacent Tissue	9.15975
ccRCC Tumor	10.3659
ccRCC Tumor	9.87903
ccRCC Tumor	7.3488
ccRCC Tumor	8.36387
ccRCC Tumor	12.0561
ccRCC Tumor	11.7134
ccRCC Tumor	9.0817
ccRCC Tumor	12.5418
ccRCC Tumor	10.9291
ccRCC Tumor	12.1998
ccRCC Tumor	9.20079
ccRCC Tumor	10.236
ccRCC Tumor	11.5977
ccRCC Tumor	8.94993
ccRCC Tumor	10.6708
ccRCC Tumor	9.17798
ccRCC Tumor	8.90065
ccRCC Tumor	10.067
ccRCC Tumor	8.56938
ccRCC Tumor	14.2941
ccRCC Tumor	11.9008
ccRCC Tumor	11.5964
ccRCC Tumor	11.025
ccRCC Tumor	9.2704
ccRCC Tumor	8.14269
ccRCC Tumor	10.7761
ccRCC Tumor	9.47465
ccRCC Tumor	10.0667
ccRCC Tumor	9.44381
ccRCC Tumor	12.0013
ccRCC Tumor	10.1427
ccRCC Tumor	10.6275
ccRCC Tumor	10.019
ccRCC Tumor	9.81357
ccRCC Tumor	7.26381
ccRCC Tumor	11.9566
ccRCC Tumor	11.3858
ccRCC Tumor	10.1967
ccRCC Tumor	11.5403
ccRCC Tumor	8.75908
ccRCC Tumor	7.08878
ccRCC Tumor	11.0499
ccRCC Tumor	11.1696
ccRCC Tumor	10.8886
ccRCC Tumor	10.5109
ccRCC Tumor	10.9171
ccRCC Tumor	10.3575
ccRCC Tumor	12.5354
ccRCC Tumor	7.93509
ccRCC Tumor	9.89055
ccRCC Tumor	12.2294
ccRCC Tumor	11.0085
ccRCC Tumor	5.44946
ccRCC Tumor	8.93397
ccRCC Tumor	11.0158
ccRCC Tumor	11.6849
ccRCC Tumor	7.29014
ccRCC Tumor	10.1968
ccRCC Tumor	11.4674
ccRCC Tumor	4.64211
ccRCC Tumor	4.60661
ccRCC Tumor	8.5016
ccRCC Tumor	12.4258
ccRCC Tumor	5.67535
ccRCC Tumor	11.8028
ccRCC Tumor	9.57789
ccRCC Tumor	8.66952
ccRCC Tumor	9.71505
ccRCC Tumor	11.5246
ccRCC Tumor	10.7237
ccRCC Tumor	9.15048
ccRCC Tumor	9.74773
ccRCC Tumor	10.6115
ccRCC Tumor	9.89743
ccRCC Tumor	15.4989
ccRCC Tumor	9.67538
ccRCC Tumor	12.659
ccRCC Tumor	12.6972
ccRCC Tumor	10.4762
ccRCC Tumor	10.9547
ccRCC Tumor	11.7287
ccRCC Tumor	10.9535
ccRCC Tumor	12.0404
ccRCC Tumor	9.70247
ccRCC Tumor	11.8436
ccRCC Tumor	12.646
ccRCC Tumor	10.1931
ccRCC Tumor	12.4187
ccRCC Tumor	10.3378
ccRCC Tumor	10.993
ccRCC Tumor	8.88966
ccRCC Tumor	12.4684
ccRCC Tumor	12.1623
ccRCC Tumor	9.75957
ccRCC Tumor	10.0801
ccRCC Tumor	11.4565
ccRCC Tumor	9.83059
ccRCC Tumor	9.75308
ccRCC Tumor	10.0864
ccRCC Tumor	12.1115
ccRCC Tumor	11.0279
ccRCC Tumor	12.5591
ccRCC Tumor	9.57829
ccRCC Tumor	11.5896
ccRCC Tumor	11.5631
ccRCC Tumor	11.5176
ccRCC Tumor	11.5185
ccRCC Tumor	9.55755
ccRCC Tumor	11.2163
ccRCC Tumor	7.56388
ccRCC Tumor	9.52506
ccRCC Tumor	7.58794
ccRCC Tumor	12.3599
ccRCC Tumor	13.3437
ccRCC Tumor	9.7223
ccRCC Tumor	10.6328
ccRCC Tumor	10.4537
ccRCC Tumor	11.1284
ccRCC Tumor	12.4788
ccRCC Tumor	11.0992
ccRCC Tumor	8.93361
ccRCC Tumor	9.9435
ccRCC Tumor	8.14358
ccRCC Tumor	12.4482
ccRCC Tumor	8.62877
ccRCC Tumor	9.32547
ccRCC Tumor	10.408
ccRCC Tumor	8.18481
ccRCC Tumor	11.3182
ccRCC Tumor	12.3483
ccRCC Tumor	11.3287
ccRCC Tumor	10.997
ccRCC Tumor	8.25934
ccRCC Tumor	8.34567
ccRCC Tumor	10.197
ccRCC Tumor	10.507
ccRCC Tumor	12.868
ccRCC Tumor	12.4774
ccRCC Tumor	14.0856
ccRCC Tumor	12.9695
ccRCC Tumor	10.5837
ccRCC Tumor	11.1013
ccRCC Tumor	11.6067
ccRCC Tumor	9.92668
ccRCC Tumor	8.28044
ccRCC Tumor	10.8377
ccRCC Tumor	6.56538
ccRCC Tumor	12.2881
ccRCC Tumor	11.2147
ccRCC Tumor	10.1791
ccRCC Tumor	11.1174
ccRCC Tumor	11.008
ccRCC Tumor	9.67974
ccRCC Tumor	7.94969
ccRCC Tumor	9.14062
ccRCC Tumor	11.766
ccRCC Tumor	9.72895
ccRCC Tumor	10.6722
ccRCC Tumor	12.4155
ccRCC Tumor	9.92109
ccRCC Tumor	9.64943
ccRCC Tumor	11.8753
ccRCC Tumor	9.2229
ccRCC Tumor	9.54484
ccRCC Tumor	11.3666
ccRCC Tumor	9.50172
ccRCC Tumor	10.1099
ccRCC Tumor	11.9178
ccRCC Tumor	8.48439
ccRCC Tumor	7.43492
ccRCC Tumor	12.1289
ccRCC Tumor	9.7656
ccRCC Tumor	9.15599
ccRCC Tumor	8.91413
ccRCC Tumor	13.3577
ccRCC Tumor	12.5375
ccRCC Tumor	11.7614
ccRCC Tumor	9.94015
ccRCC Tumor	9.5049
ccRCC Tumor	7.97022
ccRCC Tumor	10.0959
ccRCC Tumor	10.7
ccRCC Tumor	8.19073
ccRCC Tumor	9.76634
ccRCC Tumor	9.30675
ccRCC Tumor	8.25255
ccRCC Tumor	10.4522
ccRCC Tumor	9.72213
ccRCC Tumor	12.3881
ccRCC Tumor	11.2951
ccRCC Tumor	8.56212
ccRCC Tumor	11.8108
ccRCC Tumor	9.08453
ccRCC Tumor	9.73572
ccRCC Tumor	10.368
ccRCC Tumor	14.9086
ccRCC Tumor	10.7889
ccRCC Tumor	8.65276
ccRCC Tumor	11.5307
ccRCC Tumor	11.4695
ccRCC Tumor	10.1884
ccRCC Tumor	9.62535
ccRCC Tumor	11.2327
ccRCC Tumor	9.65011
ccRCC Tumor	9.142
ccRCC Tumor	8.30365
ccRCC Tumor	7.43874
ccRCC Tumor	8.84593
ccRCC Tumor	9.66546
ccRCC Tumor	12.2179
ccRCC Tumor	13.4814
ccRCC Tumor	9.65296
ccRCC Tumor	13.6876
ccRCC Tumor	8.17699
ccRCC Tumor	11.8972
ccRCC Tumor	13.4002
ccRCC Tumor	10.3032
ccRCC Tumor	11.1957
ccRCC Tumor	12.281
ccRCC Tumor	6.59849
ccRCC Tumor	10.5289
ccRCC Tumor	11.2972
ccRCC Tumor	11.8684
ccRCC Tumor	12.0522
ccRCC Tumor	11.8812
ccRCC Tumor	8.76473
ccRCC Tumor	5.77819
ccRCC Tumor	13.5306
ccRCC Tumor	7.73494
ccRCC Tumor	9.93753
ccRCC Tumor	11.3645
ccRCC Tumor	10.183
ccRCC Tumor	9.32999
ccRCC Tumor	13.7116
ccRCC Tumor	9.31482
ccRCC Tumor	10.5735
ccRCC Tumor	10.7037
ccRCC Tumor	10.5622
ccRCC Tumor	9.60847
ccRCC Tumor	9.88346
ccRCC Tumor	8.53599
ccRCC Tumor	9.23093
ccRCC Tumor	11.1914
ccRCC Tumor	11.6863
ccRCC Tumor	12.2245
ccRCC Tumor	9.83551
ccRCC Tumor	11.3964
ccRCC Tumor	13.145
ccRCC Tumor	12.1191
ccRCC Tumor	10.3963
ccRCC Tumor	8.57451
ccRCC Tumor	14.8331
ccRCC Tumor	10.0698
ccRCC Tumor	10.6851
ccRCC Tumor	11.0432
ccRCC Tumor	10.1876
ccRCC Tumor	6.22169
ccRCC Tumor	10.7001
ccRCC Tumor	11.4157
ccRCC Tumor	12.7554
ccRCC Tumor	8.15902
ccRCC Tumor	7.95343
ccRCC Tumor	12.3766
ccRCC Tumor	12.3776
ccRCC Tumor	9.96328
ccRCC Tumor	9.9737
ccRCC Tumor	10.275
ccRCC Tumor	11.5825
ccRCC Tumor	10.7257
ccRCC Tumor	12.5233
ccRCC Tumor	10.9307
ccRCC Tumor	7.11784
ccRCC Tumor	10.0978
ccRCC Tumor	9.53518
ccRCC Tumor	11.2273
ccRCC Tumor	9.00635
ccRCC Tumor	11.6452
ccRCC Tumor	13.2801
ccRCC Tumor	11.1544
ccRCC Tumor	8.03486
ccRCC Tumor	8.37857
ccRCC Tumor	11.11
ccRCC Tumor	12.5142
ccRCC Tumor	11.1324
ccRCC Tumor	8.84888
ccRCC Tumor	9.35188
ccRCC Tumor	9.69281
ccRCC Tumor	9.93103
ccRCC Tumor	12.2114
ccRCC Tumor	13.3022
ccRCC Tumor	11.0934
ccRCC Tumor	11.6248
ccRCC Tumor	11.6307
ccRCC Tumor	11.5547
ccRCC Tumor	12.0272
ccRCC Tumor	10.0758
ccRCC Tumor	12.6144
ccRCC Tumor	11.3729
ccRCC Tumor	11.1319
ccRCC Tumor	10.8534
ccRCC Tumor	11.7107
ccRCC Tumor	10.4304
ccRCC Tumor	9.68749
ccRCC Tumor	11.555
ccRCC Tumor	10.6079
ccRCC Tumor	11.1836
ccRCC Tumor	9.96254
ccRCC Tumor	11.0524
ccRCC Tumor	10.0258
ccRCC Tumor	9.37646
ccRCC Tumor	11.0691
ccRCC Tumor	9.23841
ccRCC Tumor	11.9831
ccRCC Tumor	11.8699
ccRCC Tumor	11.0152
ccRCC Tumor	8.44672
ccRCC Tumor	10.3336
ccRCC Tumor	10.2269
ccRCC Tumor	10.3104
ccRCC Tumor	9.22022
ccRCC Tumor	10.27
ccRCC Tumor	11.7701
ccRCC Tumor	11.1579
ccRCC Tumor	9.3325
ccRCC Tumor	10.8241
ccRCC Tumor	10.027
ccRCC Tumor	9.63483
ccRCC Tumor	10.9255
ccRCC Tumor	7.86958
ccRCC Tumor	11.2119
ccRCC Tumor	9.44636
ccRCC Tumor	11.7627
ccRCC Tumor	9.28659
ccRCC Tumor	11.305
ccRCC Tumor	10.2781
ccRCC Tumor	10.9735
ccRCC Tumor	12.737
ccRCC Tumor	8.70624
ccRCC Tumor	12.5555
ccRCC Tumor	11.2254
ccRCC Tumor	11.745
ccRCC Tumor	8.73654
ccRCC Tumor	13.229
ccRCC Tumor	10.3035
ccRCC Tumor	11.5059
ccRCC Tumor	12.4952
ccRCC Tumor	8.04931
ccRCC Tumor	11.6018
ccRCC Tumor	9.10329
ccRCC Tumor	10.5929
ccRCC Tumor	9.58776
ccRCC Tumor	10.6851
ccRCC Tumor	12.7274
ccRCC Tumor	11.9525
ccRCC Tumor	9.98768
ccRCC Tumor	12.1384
ccRCC Tumor	9.12679
ccRCC Tumor	9.47683
ccRCC Tumor	11.7203
ccRCC Tumor	10.6874
ccRCC Tumor	11.8738
ccRCC Tumor	11.397
ccRCC Tumor	8.6006
ccRCC Tumor	9.61542
ccRCC Tumor	10.7212
ccRCC Tumor	9.83074
ccRCC Tumor	11.0458
ccRCC Tumor	11.599
ccRCC Tumor	8.76536
ccRCC Tumor	10.1122
ccRCC Tumor	11.6339
ccRCC Tumor	11.6053
ccRCC Tumor	10.6234
ccRCC Tumor	10.1144
ccRCC Tumor	12.0248
ccRCC Tumor	10.2418
ccRCC Tumor	8.52261
ccRCC Tumor	12.6921
ccRCC Tumor	11.8249
ccRCC Tumor	10.1339
ccRCC Tumor	10.0303
ccRCC Tumor	8.8214
ccRCC Tumor	10.2798
ccRCC Tumor	8.77039
ccRCC Tumor	12.917
ccRCC Tumor	12.9384
ccRCC Tumor	9.13887
ccRCC Tumor	8.90513
ccRCC Tumor	11.0947
ccRCC Tumor	9.74869
ccRCC Tumor	11.8894
ccRCC Tumor	11.7156
ccRCC Tumor	12.8076
ccRCC Tumor	10.7891
ccRCC Tumor	9.78548
ccRCC Tumor	10.6037
ccRCC Tumor	9.94176
ccRCC Tumor	10.8341
ccRCC Tumor	10.3885
ccRCC Tumor	11.2195
ccRCC Tumor	11.0498
ccRCC Tumor	10.5583
ccRCC Tumor	11.5057
ccRCC Tumor	10.004
ccRCC Tumor	10.7913
ccRCC Tumor	11.6856
ccRCC Tumor	11.4496
ccRCC Tumor	11.1712
ccRCC Tumor	10.6005
ccRCC Tumor	10.5056
ccRCC Tumor	12.164
ccRCC Tumor	13.2924
ccRCC Tumor	12.1563
ccRCC Tumor	11.6489
ccRCC Tumor	10.984
ccRCC Tumor	9.72891
ccRCC Tumor	11.6881
ccRCC Tumor	11.3886
ccRCC Tumor	9.74065
ccRCC Tumor	12.8328
ccRCC Tumor	9.31997
ccRCC Tumor	7.24059
ccRCC Tumor	10.8958
ccRCC Tumor	9.86183
ccRCC Tumor	9.36488
ccRCC Tumor	12.6997
ccRCC Tumor	12.393
ccRCC Tumor	11.9977
ccRCC Tumor	11.7541
ccRCC Tumor	10.9595
ccRCC Tumor	12.1755
ccRCC Tumor	11.4097
ccRCC Tumor	12.7822
ccRCC Tumor	11.0345
ccRCC Tumor	8.9368
ccRCC Tumor	10.6671
ccRCC Tumor	9.28206
ccRCC Tumor	8.88027
ccRCC Tumor	12.1739
ccRCC Tumor	13.0509
ccRCC Tumor	10.2103
ccRCC Tumor	11.1881
ccRCC Tumor	13.1313
ccRCC Tumor	9.88097
ccRCC Tumor	12.0441
ccRCC Tumor	9.92395
ccRCC Tumor	11.684
ccRCC Tumor	8.67452
ccRCC Tumor	12.1515
ccRCC Tumor	10.2454
ccRCC Tumor	12.108
ccRCC Tumor	11.8182
ccRCC Tumor	8.00217
ccRCC Tumor	12.6721
ccRCC Tumor	8.5099
ccRCC Tumor	10.4719
ccRCC Tumor	9.97344
ccRCC Tumor	9.92309
ccRCC Tumor	7.85791
ccRCC Tumor	8.80819
ccRCC Tumor	8.41977
ccRCC Tumor	8.62178
ccRCC Tumor	9.29474
ccRCC Tumor	10.7194
ccRCC Tumor	13.2613
ccRCC Tumor	9.96613
ccRCC Tumor	10.4449
ccRCC Tumor	10.2466
ccRCC Tumor	8.7649
ccRCC Tumor	11.1773
ccRCC Tumor	10.4876
ccRCC Tumor	9.52607
ccRCC Tumor	11.3588
ccRCC Tumor	8.67838
ccRCC Tumor	11.1898
ccRCC Tumor	10.8422
ccRCC Tumor	12.6815
ccRCC Tumor	10.2417
ccRCC Tumor	9.35462
ccRCC Tumor	8.77806
ccRCC Tumor	12.0309
ccRCC Tumor	9.67488
ccRCC Tumor	8.65742
ccRCC Tumor	11.6696
ccRCC Tumor	10.6685
ccRCC Tumor	10.5215
ccRCC Tumor	10.239
ccRCC Tumor	9.13574
ccRCC Tumor	9.4624
ccRCC Tumor	10.3698
ccRCC Tumor	12.3243
ccRCC Tumor	10.4774
ccRCC Tumor	10.2593
ccRCC Tumor	10.0656
ccRCC Tumor	10.2988
ccRCC Tumor	9.61897
ccRCC Tumor	9.54696
ccRCC Tumor	11.2744
ccRCC Tumor	10.1795
ccRCC Tumor	10.0857
ccRCC Tumor	7.82407
ccRCC Tumor	8.80255
ccRCC Tumor	11.968
ccRCC Tumor	8.01606
ccRCC Tumor	9.63535
ccRCC Tumor	11.4437
ccRCC Tumor	10.2306
ccRCC Tumor	11.9184
ccRCC Tumor	8.85269
ccRCC Tumor	6.98454

## Sheet: Supp. Fig1B
Tumor Stage	CFH Log2(TPM+1)
Stage I	10.3659
Stage I	9.87903
Stage I	7.3488
Stage I	11.7134
Stage I	9.0817
Stage I	12.1998
Stage I	9.20079
Stage I	10.236
Stage I	11.5977
Stage I	8.94993
Stage I	10.6708
Stage I	9.17798
Stage I	8.90065
Stage I	14.2941
Stage I	11.5964
Stage I	10.7761
Stage I	9.47465
Stage I	10.0667
Stage I	12.0013
Stage I	10.1427
Stage I	10.6275
Stage I	9.81357
Stage I	7.26381
Stage I	11.9566
Stage I	11.3858
Stage I	10.1967
Stage I	11.5403
Stage I	8.75908
Stage I	7.08878
Stage I	11.0499
Stage I	11.1696
Stage I	10.8886
Stage I	10.5109
Stage I	10.9171
Stage I	10.3575
Stage I	12.5354
Stage I	7.93509
Stage I	12.2294
Stage I	5.44946
Stage I	10.1968
Stage I	4.64211
Stage I	8.5016
Stage I	11.8028
Stage I	9.71505
Stage I	9.15048
Stage I	9.74773
Stage I	10.6115
Stage I	9.89743
Stage I	15.4989
Stage I	9.67538
Stage I	11.5185
Stage I	9.55755
Stage I	9.52506
Stage I	7.58794
Stage I	13.3437
Stage I	9.7223
Stage I	10.6328
Stage I	10.408
Stage I	11.3182
Stage I	10.997
Stage I	10.197
Stage I	10.5837
Stage I	9.92668
Stage I	8.28044
Stage I	10.8377
Stage I	10.1791
Stage I	7.94969
Stage I	9.14062
Stage I	11.766
Stage I	9.72895
Stage I	10.6722
Stage I	9.64943
Stage I	11.8753
Stage I	9.54484
Stage I	9.50172
Stage I	11.9178
Stage I	8.48439
Stage I	7.43492
Stage I	9.7656
Stage I	9.15599
Stage I	8.91413
Stage I	12.5375
Stage I	9.94015
Stage I	10.7
Stage I	9.76634
Stage I	9.30675
Stage I	8.25255
Stage I	9.72213
Stage I	12.3881
Stage I	11.2951
Stage I	11.8108
Stage I	10.368
Stage I	10.7889
Stage I	8.65276
Stage I	11.5307
Stage I	10.1884
Stage I	9.65011
Stage I	9.142
Stage I	8.84593
Stage I	9.66546
Stage I	13.4814
Stage I	8.17699
Stage I	11.1957
Stage I	12.281
Stage I	6.59849
Stage I	10.5289
Stage I	11.8684
Stage I	12.0522
Stage I	11.8812
Stage I	5.77819
Stage I	13.5306
Stage I	7.73494
Stage I	11.3645
Stage I	9.32999
Stage I	13.7116
Stage I	9.31482
Stage I	10.5735
Stage I	10.5622
Stage I	9.60847
Stage I	9.23093
Stage I	9.83551
Stage I	12.1191
Stage I	10.3963
Stage I	8.57451
Stage I	14.8331
Stage I	12.7554
Stage I	8.15902
Stage I	10.275
Stage I	7.11784
Stage I	10.0978
Stage I	9.53518
Stage I	11.2273
Stage I	11.6452
Stage I	13.2801
Stage I	11.1544
Stage I	8.03486
Stage I	8.37857
Stage I	11.11
Stage I	8.84888
Stage I	9.35188
Stage I	9.69281
Stage I	9.93103
Stage I	12.2114
Stage I	13.3022
Stage I	11.0934
Stage I	11.6307
Stage I	11.5547
Stage I	12.0272
Stage I	11.1319
Stage I	11.7107
Stage I	10.4304
Stage I	9.68749
Stage I	10.6079
Stage I	9.96254
Stage I	11.0524
Stage I	10.0258
Stage I	11.0691
Stage I	9.23841
Stage I	10.2269
Stage I	10.3104
Stage I	10.27
Stage I	9.3325
Stage I	10.027
Stage I	9.63483
Stage I	10.9255
Stage I	7.86958
Stage I	11.2119
Stage I	9.44636
Stage I	11.7627
Stage I	9.28659
Stage I	11.305
Stage I	10.9735
Stage I	8.70624
Stage I	12.5555
Stage I	11.2254
Stage I	11.745
Stage I	8.73654
Stage I	13.229
Stage I	10.3035
Stage I	11.5059
Stage I	8.04931
Stage I	11.6018
Stage I	10.5929
Stage I	9.58776
Stage I	10.6851
Stage I	12.7274
Stage I	11.9525
Stage I	9.98768
Stage I	9.12679
Stage I	9.47683
Stage I	11.7203
Stage I	10.6874
Stage I	10.7212
Stage I	9.83074
Stage I	11.8249
Stage I	10.0303
Stage I	11.0947
Stage I	11.7156
Stage I	9.78548
Stage I	10.6037
Stage I	11.2195
Stage I	10.004
Stage I	11.6856
Stage I	11.1712
Stage I	13.2924
Stage I	11.6489
Stage I	10.984
Stage I	9.86183
Stage I	12.6997
Stage I	12.393
Stage I	11.9977
Stage I	10.9595
Stage I	12.1755
Stage I	8.9368
Stage I	10.6671
Stage I	13.0509
Stage I	10.2103
Stage I	9.88097
Stage I	12.0441
Stage I	9.92395
Stage I	8.67452
Stage I	12.1515
Stage I	10.2454
Stage I	8.00217
Stage I	10.4719
Stage I	7.85791
Stage I	8.77806
Stage I	12.0309
Stage I	8.65742
Stage I	10.6685
Stage I	10.239
Stage I	9.13574
Stage I	9.4624
Stage I	10.3698
Stage I	12.3243
Stage I	10.4774
Stage I	10.2593
Stage I	10.2988
Stage I	9.61897
Stage I	9.54696
Stage I	11.2744
Stage I	10.1795
Stage I	11.968
Stage I	8.01606
Stage I	9.63535
Stage I	11.4437
Stage I	11.9184
Stage I	8.85269
Stage I	6.98454
Stage II	12.5418
Stage II	10.9291
Stage II	10.067
Stage II	8.56938
Stage II	11.025
Stage II	8.14269
Stage II	9.44381
Stage II	11.0158
Stage II	11.6849
Stage II	7.29014
Stage II	4.60661
Stage II	5.67535
Stage II	9.57789
Stage II	8.66952
Stage II	10.7237
Stage II	11.0279
Stage II	9.57829
Stage II	11.5176
Stage II	9.32547
Stage II	13.3577
Stage II	8.19073
Stage II	10.4522
Stage II	9.08453
Stage II	9.62535
Stage II	11.8972
Stage II	9.93753
Stage II	10.183
Stage II	12.2245
Stage II	11.3964
Stage II	13.145
Stage II	10.0698
Stage II	11.555
Stage II	11.1836
Stage II	10.2781
Stage II	11.397
Stage II	10.1122
Stage II	10.6234
Stage II	10.2798
Stage II	10.6005
Stage II	9.72891
Stage II	11.4097
Stage II	11.8182
Stage II	8.5099
Stage II	9.92309
Stage II	8.80819
Stage II	8.41977
Stage II	8.62178
Stage II	13.2613
Stage II	9.52607
Stage II	10.2417
Stage II	9.35462
Stage II	9.67488
Stage II	10.5215
Stage II	10.2306
Stage III	8.36387
Stage III	12.0561
Stage III	11.9008
Stage III	9.2704
Stage III	10.019
Stage III	9.89055
Stage III	11.0085
Stage III	8.93397
Stage III	12.4258
Stage III	11.5246
Stage III	10.9547
Stage III	11.7287
Stage III	10.9535
Stage III	10.3378
Stage III	10.993
Stage III	8.88966
Stage III	12.1623
Stage III	10.0801
Stage III	11.4565
Stage III	9.83059
Stage III	9.75308
Stage III	12.1115
Stage III	12.5591
Stage III	11.5631
Stage III	11.2163
Stage III	11.1284
Stage III	12.4788
Stage III	12.4482
Stage III	8.62877
Stage III	8.18481
Stage III	11.3287
Stage III	8.34567
Stage III	12.4774
Stage III	14.0856
Stage III	12.9695
Stage III	11.1013
Stage III	11.6067
Stage III	12.2881
Stage III	11.2147
Stage III	11.1174
Stage III	9.67974
Stage III	12.4155
Stage III	9.2229
Stage III	11.3666
Stage III	10.1099
Stage III	12.1289
Stage III	11.7614
Stage III	9.5049
Stage III	10.0959
Stage III	14.9086
Stage III	8.30365
Stage III	7.43874
Stage III	12.2179
Stage III	13.6876
Stage III	13.4002
Stage III	10.3032
Stage III	11.2972
Stage III	8.76473
Stage III	10.7037
Stage III	9.88346
Stage III	8.53599
Stage III	11.1914
Stage III	11.6863
Stage III	10.6851
Stage III	11.0432
Stage III	10.1876
Stage III	6.22169
Stage III	11.4157
Stage III	7.95343
Stage III	12.3766
Stage III	12.3776
Stage III	9.96328
Stage III	9.9737
Stage III	11.5825
Stage III	10.9307
Stage III	9.00635
Stage III	10.0758
Stage III	12.6144
Stage III	11.3729
Stage III	10.8534
Stage III	9.37646
Stage III	11.9831
Stage III	11.8699
Stage III	11.0152
Stage III	8.44672
Stage III	9.22022
Stage III	11.7701
Stage III	11.1579
Stage III	10.8241
Stage III	12.737
Stage III	9.10329
Stage III	12.1384
Stage III	11.8738
Stage III	9.61542
Stage III	11.0458
Stage III	11.6339
Stage III	10.2418
Stage III	8.52261
Stage III	10.1339
Stage III	8.77039
Stage III	12.917
Stage III	12.9384
Stage III	9.13887
Stage III	10.7891
Stage III	9.94176
Stage III	10.3885
Stage III	10.5583
Stage III	11.5057
Stage III	11.4496
Stage III	10.5056
Stage III	11.6881
Stage III	12.8328
Stage III	9.36488
Stage III	9.28206
Stage III	12.1739
Stage III	11.684
Stage III	9.97344
Stage III	9.96613
Stage III	10.4449
Stage III	10.2466
Stage III	8.67838
Stage III	11.1898
Stage III	10.8422
Stage III	10.0857
Stage IV	11.4674
Stage IV	12.659
Stage IV	12.6972
Stage IV	10.4762
Stage IV	12.0404
Stage IV	9.70247
Stage IV	11.8436
Stage IV	12.646
Stage IV	10.1931
Stage IV	12.4187
Stage IV	12.4684
Stage IV	9.75957
Stage IV	10.0864
Stage IV	11.5896
Stage IV	7.56388
Stage IV	12.3599
Stage IV	10.4537
Stage IV	11.0992
Stage IV	8.93361
Stage IV	9.9435
Stage IV	8.14358
Stage IV	12.3483
Stage IV	8.25934
Stage IV	10.507
Stage IV	12.868
Stage IV	6.56538
Stage IV	11.008
Stage IV	9.92109
Stage IV	7.97022
Stage IV	8.56212
Stage IV	9.73572
Stage IV	11.4695
Stage IV	11.2327
Stage IV	9.65296
Stage IV	10.7001
Stage IV	10.7257
Stage IV	12.5233
Stage IV	12.5142
Stage IV	11.1324
Stage IV	11.6248
Stage IV	10.3336
Stage IV	12.4952
Stage IV	8.6006
Stage IV	11.599
Stage IV	8.76536
Stage IV	11.6053
Stage IV	10.1144
Stage IV	12.0248
Stage IV	12.6921
Stage IV	8.8214
Stage IV	8.90513
Stage IV	9.74869
Stage IV	11.8894
Stage IV	12.8076
Stage IV	10.8341
Stage IV	11.0498
Stage IV	10.7913
Stage IV	12.164
Stage IV	12.1563
Stage IV	11.3886
Stage IV	9.74065
Stage IV	9.31997
Stage IV	7.24059
Stage IV	10.8958
Stage IV	11.7541
Stage IV	12.7822
Stage IV	11.0345
Stage IV	8.88027
Stage IV	11.1881
Stage IV	13.1313
Stage IV	12.108
Stage IV	12.6721
Stage IV	9.29474
Stage IV	10.7194
Stage IV	8.7649
Stage IV	11.1773
Stage IV	10.4876
Stage IV	11.3588
Stage IV	12.6815
Stage IV	11.6696
Stage IV	10.0656
Stage IV	7.82407
Stage IV	8.80255

## Sheet: Supp. Fig1C
Tumor Grade	CFH Log2(TPM+1)
Grade 1	9.20079
Grade 1	11.5977
Grade 1	9.17798
Grade 1	10.8886
Grade 1	12.5354
Grade 1	9.67538
Grade 1	9.64943
Grade 1	10.7889
Grade 1	9.23093
Grade 1	9.92395
Grade 1	9.54696
Grade 1	6.98454
Grade 1	9.62535
Grade 2	10.3659
Grade 2	9.87903
Grade 2	11.7134
Grade 2	12.1998
Grade 2	10.236
Grade 2	10.6708
Grade 2	8.90065
Grade 2	11.5964
Grade 2	10.7761
Grade 2	9.47465
Grade 2	10.0667
Grade 2	12.0013
Grade 2	10.6275
Grade 2	7.26381
Grade 2	11.9566
Grade 2	10.1967
Grade 2	8.75908
Grade 2	7.08878
Grade 2	11.0499
Grade 2	10.5109
Grade 2	10.9171
Grade 2	10.3575
Grade 2	7.93509
Grade 2	10.1968
Grade 2	8.5016
Grade 2	11.8028
Grade 2	9.74773
Grade 2	10.6115
Grade 2	11.5185
Grade 2	9.52506
Grade 2	10.6328
Grade 2	10.408
Grade 2	8.28044
Grade 2	10.8377
Grade 2	10.1791
Grade 2	7.94969
Grade 2	9.14062
Grade 2	11.766
Grade 2	9.72895
Grade 2	10.6722
Grade 2	9.54484
Grade 2	9.50172
Grade 2	11.9178
Grade 2	7.43492
Grade 2	9.7656
Grade 2	8.91413
Grade 2	9.94015
Grade 2	9.76634
Grade 2	9.30675
Grade 2	9.72213
Grade 2	12.3881
Grade 2	11.2951
Grade 2	10.368
Grade 2	8.65276
Grade 2	11.5307
Grade 2	10.1884
Grade 2	9.65011
Grade 2	8.84593
Grade 2	9.66546
Grade 2	11.1957
Grade 2	12.281
Grade 2	6.59849
Grade 2	12.0522
Grade 2	11.8812
Grade 2	13.5306
Grade 2	13.7116
Grade 2	9.31482
Grade 2	10.5735
Grade 2	9.60847
Grade 2	9.83551
Grade 2	12.1191
Grade 2	10.3963
Grade 2	8.57451
Grade 2	14.8331
Grade 2	8.15902
Grade 2	10.275
Grade 2	7.11784
Grade 2	10.0978
Grade 2	9.53518
Grade 2	11.2273
Grade 2	13.2801
Grade 2	11.1544
Grade 2	8.37857
Grade 2	11.11
Grade 2	8.84888
Grade 2	9.35188
Grade 2	9.69281
Grade 2	13.3022
Grade 2	11.0934
Grade 2	11.6307
Grade 2	11.5547
Grade 2	12.0272
Grade 2	11.1319
Grade 2	11.7107
Grade 2	10.6079
Grade 2	11.0524
Grade 2	10.0258
Grade 2	9.23841
Grade 2	9.3325
Grade 2	10.027
Grade 2	9.44636
Grade 2	9.28659
Grade 2	10.9735
Grade 2	8.70624
Grade 2	11.2254
Grade 2	11.745
Grade 2	8.73654
Grade 2	10.3035
Grade 2	8.04931
Grade 2	10.6851
Grade 2	12.7274
Grade 2	9.12679
Grade 2	9.47683
Grade 2	11.7203
Grade 2	10.6874
Grade 2	10.7212
Grade 2	9.78548
Grade 2	11.2195
Grade 2	11.6856
Grade 2	11.1712
Grade 2	13.2924
Grade 2	10.6671
Grade 2	13.0509
Grade 2	10.2103
Grade 2	9.88097
Grade 2	8.67452
Grade 2	12.1515
Grade 2	10.2454
Grade 2	8.00217
Grade 2	10.4719
Grade 2	8.77806
Grade 2	10.6685
Grade 2	10.239
Grade 2	9.13574
Grade 2	9.4624
Grade 2	10.3698
Grade 2	12.3243
Grade 2	10.4774
Grade 2	10.2593
Grade 2	10.2988
Grade 2	10.1795
Grade 2	11.4437
Grade 2	11.9184
Grade 2	8.85269
Grade 2	10.9291
Grade 2	11.025
Grade 2	9.44381
Grade 2	11.0158
Grade 2	5.67535
Grade 2	8.66952
Grade 2	9.32547
Grade 2	13.3577
Grade 2	8.19073
Grade 2	11.8972
Grade 2	10.183
Grade 2	12.2245
Grade 2	10.0698
Grade 2	11.1836
Grade 2	10.2781
Grade 2	10.1122
Grade 2	8.5099
Grade 2	8.41977
Grade 2	8.62178
Grade 2	9.52607
Grade 2	10.2417
Grade 2	9.67488
Grade 2	10.5215
Grade 2	10.2306
Grade 2	12.0561
Grade 2	11.9008
Grade 2	10.019
Grade 2	9.89055
Grade 2	8.93397
Grade 2	12.1623
Grade 2	10.0801
Grade 2	8.18481
Grade 2	11.3287
Grade 2	12.9695
Grade 2	12.2881
Grade 2	11.1174
Grade 2	14.9086
Grade 2	8.30365
Grade 2	12.2179
Grade 2	8.76473
Grade 2	10.7037
Grade 2	8.53599
Grade 2	11.6863
Grade 2	10.6851
Grade 2	11.0432
Grade 2	10.1876
Grade 2	7.95343
Grade 2	9.9737
Grade 2	11.5825
Grade 2	9.37646
Grade 2	12.1384
Grade 2	9.61542
Grade 2	10.2418
Grade 2	8.52261
Grade 2	8.77039
Grade 2	9.36488
Grade 2	12.1739
Grade 2	8.67838
Grade 2	11.1898
Grade 2	11.4674
Grade 2	8.93361
Grade 2	9.9435
Grade 2	12.868
Grade 2	11.4695
Grade 2	8.88027
Grade 2	11.1881
Grade 2	9.29474
Grade 2	8.7649
Grade 2	11.3588
Grade 2	11.6696
Grade 3	7.3488
Grade 3	9.0817
Grade 3	8.94993
Grade 3	14.2941
Grade 3	10.1427
Grade 3	9.81357
Grade 3	11.3858
Grade 3	11.5403
Grade 3	11.1696
Grade 3	12.2294
Grade 3	4.64211
Grade 3	9.71505
Grade 3	9.15048
Grade 3	9.55755
Grade 3	7.58794
Grade 3	13.3437
Grade 3	9.7223
Grade 3	11.3182
Grade 3	10.997
Grade 3	10.197
Grade 3	10.5837
Grade 3	9.92668
Grade 3	11.8753
Grade 3	8.48439
Grade 3	9.15599
Grade 3	12.5375
Grade 3	10.7
Grade 3	8.25255
Grade 3	11.8108
Grade 3	9.142
Grade 3	13.4814
Grade 3	8.17699
Grade 3	10.5289
Grade 3	11.8684
Grade 3	5.77819
Grade 3	7.73494
Grade 3	11.3645
Grade 3	9.32999
Grade 3	10.5622
Grade 3	12.7554
Grade 3	11.6452
Grade 3	8.03486
Grade 3	9.93103
Grade 3	12.2114
Grade 3	10.4304
Grade 3	9.68749
Grade 3	9.96254
Grade 3	11.0691
Grade 3	10.2269
Grade 3	10.3104
Grade 3	10.27
Grade 3	10.9255
Grade 3	7.86958
Grade 3	11.2119
Grade 3	11.7627
Grade 3	11.305
Grade 3	13.229
Grade 3	11.5059
Grade 3	11.6018
Grade 3	10.5929
Grade 3	9.58776
Grade 3	9.98768
Grade 3	9.83074
Grade 3	10.0303
Grade 3	11.0947
Grade 3	10.6037
Grade 3	10.004
Grade 3	11.6489
Grade 3	10.984
Grade 3	9.86183
Grade 3	12.6997
Grade 3	10.9595
Grade 3	12.1755
Grade 3	8.9368
Grade 3	12.0441
Grade 3	7.85791
Grade 3	12.0309
Grade 3	8.65742
Grade 3	9.61897
Grade 3	11.2744
Grade 3	11.968
Grade 3	8.01606
Grade 3	12.5418
Grade 3	8.56938
Grade 3	8.14269
Grade 3	11.6849
Grade 3	9.57789
Grade 3	10.7237
Grade 3	11.0279
Grade 3	9.57829
Grade 3	10.4522
Grade 3	9.93753
Grade 3	11.3964
Grade 3	13.145
Grade 3	11.555
Grade 3	10.6234
Grade 3	10.2798
Grade 3	10.6005
Grade 3	9.72891
Grade 3	11.4097
Grade 3	9.92309
Grade 3	8.80819
Grade 3	13.2613
Grade 3	9.35462
Grade 3	8.36387
Grade 3	9.2704
Grade 3	11.0085
Grade 3	12.4258
Grade 3	11.5246
Grade 3	10.9535
Grade 3	8.88966
Grade 3	11.4565
Grade 3	9.83059
Grade 3	9.75308
Grade 3	12.5591
Grade 3	11.5631
Grade 3	12.4788
Grade 3	12.4482
Grade 3	8.62877
Grade 3	8.34567
Grade 3	12.4774
Grade 3	11.1013
Grade 3	11.6067
Grade 3	9.67974
Grade 3	9.2229
Grade 3	11.3666
Grade 3	11.7614
Grade 3	9.5049
Grade 3	10.0959
Grade 3	7.43874
Grade 3	13.4002
Grade 3	10.3032
Grade 3	11.2972
Grade 3	9.88346
Grade 3	11.1914
Grade 3	6.22169
Grade 3	12.3766
Grade 3	12.3776
Grade 3	9.96328
Grade 3	10.0758
Grade 3	11.3729
Grade 3	10.8534
Grade 3	11.9831
Grade 3	11.8699
Grade 3	11.0152
Grade 3	8.44672
Grade 3	9.22022
Grade 3	10.8241
Grade 3	9.10329
Grade 3	11.8738
Grade 3	11.0458
Grade 3	10.1339
Grade 3	12.917
Grade 3	12.9384
Grade 3	9.13887
Grade 3	9.94176
Grade 3	10.3885
Grade 3	10.5583
Grade 3	11.5057
Grade 3	11.4496
Grade 3	10.5056
Grade 3	11.6881
Grade 3	9.28206
Grade 3	9.97344
Grade 3	10.4449
Grade 3	10.2466
Grade 3	10.0857
Grade 3	12.6972
Grade 3	10.4762
Grade 3	10.1931
Grade 3	12.4684
Grade 3	9.75957
Grade 3	10.0864
Grade 3	7.56388
Grade 3	12.3599
Grade 3	10.4537
Grade 3	11.0992
Grade 3	8.14358
Grade 3	12.3483
Grade 3	8.25934
Grade 3	10.507
Grade 3	11.008
Grade 3	7.97022
Grade 3	8.56212
Grade 3	9.73572
Grade 3	11.2327
Grade 3	9.65296
Grade 3	10.7001
Grade 3	10.1144
Grade 3	12.0248
Grade 3	8.8214
Grade 3	8.90513
Grade 3	9.74869
Grade 3	10.7913
Grade 3	9.74065
Grade 3	7.24059
Grade 3	11.0345
Grade 3	12.108
Grade 3	10.4876
Grade 3	8.80255
Grade 4	9.63483
Grade 4	12.5555
Grade 4	11.9525
Grade 4	11.8249
Grade 4	11.7156
Grade 4	12.393
Grade 4	11.9977
Grade 4	10.067
Grade 4	11.5176
Grade 4	11.397
Grade 4	11.8182
Grade 4	10.9547
Grade 4	11.7287
Grade 4	10.3378
Grade 4	10.993
Grade 4	12.1115
Grade 4	11.2163
Grade 4	11.1284
Grade 4	11.2147
Grade 4	12.4155
Grade 4	10.1099
Grade 4	12.1289
Grade 4	13.6876
Grade 4	11.4157
Grade 4	10.9307
Grade 4	9.00635
Grade 4	12.6144
Grade 4	11.7701
Grade 4	11.1579
Grade 4	12.737
Grade 4	11.6339
Grade 4	10.7891
Grade 4	12.8328
Grade 4	11.684
Grade 4	9.96613
Grade 4	10.8422
Grade 4	12.659
Grade 4	12.0404
Grade 4	9.70247
Grade 4	11.8436
Grade 4	12.646
Grade 4	12.4187
Grade 4	11.5896
Grade 4	6.56538
Grade 4	9.92109
Grade 4	10.7257
Grade 4	12.5233
Grade 4	12.5142
Grade 4	11.1324
Grade 4	11.6248
Grade 4	10.3336
Grade 4	12.4952
Grade 4	8.6006
Grade 4	11.599
Grade 4	8.76536
Grade 4	11.6053
Grade 4	12.6921
Grade 4	11.8894
Grade 4	12.8076
Grade 4	10.8341
Grade 4	11.0498
Grade 4	12.164
Grade 4	12.1563
Grade 4	11.3886
Grade 4	9.31997
Grade 4	10.8958
Grade 4	11.7541
Grade 4	12.7822
Grade 4	13.1313
Grade 4	12.6721
Grade 4	10.7194
Grade 4	11.1773
Grade 4	12.6815
Grade 4	10.0656
Grade 4	7.82407

## Sheet: Supp. Fig4C
X axis	Y axis
IL6 log2(TPM+1) Expression Public 23Q4	CFH log2(TPM+1) Expression Public 23Q4
4.84147	5.63807
0	0.0426443
6.91982	7.77288
6.36405	7.09466
8.40267	4.03914
1.94111	3.78973
3.08406	0.933573
4.59156	0.422233
3.27053	4.12681
8.53165	5.77321
5.32733	5.70321
3.87971	1.23879
6.20614	1.55582
10.1413	4.64731
4.40667	4.51665
2.95047	0.9855
3.69377	5.77294
7.363	3.91839
7.72	4.84449
5.22535	3.98823
1.10434	4.1177
1.62293	5.38681
0.15056	0.695994
5.46467	3.16027
0.575312	1.72683
1.27501	3.34625
7.62505	1
9.53146	5.31868
5.64847	6.27947
7.05072	5.25475
4.48349	6.26903
8.44506	5.25776
3.77083	5.79675
3.68145	0.669027
8.22018	5.74497
5.76527	2.01078

## Sheet: Supp. Fig4D-F
A498			Caki			BJ
Treatment	CFH Expression		Treatment	CFH Expression		Treatment	CFH Expression
Non-Stimulated	0.971438		Non-Stimulated	0.927451		Non-Stimulated	1.01158
Non-Stimulated	1.02856		Non-Stimulated	1.07255		Non-Stimulated	0.98842
IL-1β	1.19946		IL-1β	0.73057		IL-1β	5.93059
IL-1β	1.17364		IL-1β	0.638759		IL-6	1.15625
IL-6	1.34715		IL-6	1.36203		IL-6	1.00271
IL-6	1.22346		IL-6	1.57207		TNFα	7.85997
TNFα	1.11504		TNFα	0.538804		TNFα	8.8588
TNFα	1.04686		TNFα	0.639506		TGF-β	0.635072
TGF-β	0.917838		TGF-β	0.52239		TGF-β	0.611392
TGF-β	1.00149		TGF-β	0.583859

## Sheet: Supp. Fig4G-I
A498			Caki			BJ
Treatment	FH SN		Treatment	FH SN		Treatment	FH SN
Non-Stimulated	1.01092		Non-Stimulated	0.953616		Non-Stimulated	1.00181
Non-Stimulated	1.00234		Non-Stimulated	0.86212		Non-Stimulated	1.10779
Non-Stimulated	0.986736		Non-Stimulated	1.18426		Non-Stimulated	0.890399
IL-1β	1.11343		Non-Stimulated	0.911725		Non-Stimulated	1.00181
IL-1β	1.08961		Non-Stimulated	0.995071		Non-Stimulated	1.10779
IL-1β	1.10906		Non-Stimulated	1.0932		Non-Stimulated	0.890399
IL-6	1.26484		IL-1β	0.139485		IL-1β	4.46583
IL-6	1.24432		IL-1β	0.729799		IL-1β	4.52436
IL-6	1.23684		IL-1β	0.418456		IL-1β	4.49284
TNFα	1.12212		IL-1β	0.641161		IL-1β	4.46583
TNFα	1.08061		IL-1β	0.678632		IL-1β	4.52436
TNFα	1.10369		IL-1β	0.661145		IL-1β	4.49284
TGF-β	0.77877		IL-6	3.50316		IL-6	0.753918
TGF-β	0.753505		IL-6	3.69612		IL-6	0.716923
TGF-β	0.717049		IL-6	3.28989		IL-6	0.794739
			IL-6	2.26149		IL-6	0.753918
			IL-6	2.41573		IL-6	0.716923
			IL-6	2.38406		IL-6	0.794739
			TNFα	1.36912		TNFα	5.11516
			TNFα	0.822424		TNFα	4.88554
			TNFα	0.848151		TNFα	4.69344
			TNFα	0.402843		TNFα	5.11516
			TNFα	0.398484		TNFα	4.88554
			TNFα	0.436262		TNFα	4.69344
			TGF-β	0.526508		TGF-β	1.1436
			TGF-β	0.99581		TGF-β	0.720375
			TGF-β	0.9047		TGF-β	0.852444
			TGF-β	0.674157		TGF-β	1.1436
			TGF-β	0.562983		TGF-β	0.720375
			TGF-β	0.637473		TGF-β	0.852444

[truncated: 10 more sheets: Supp. Fig4J, Supp. Fig4K, Supp. Fig4L, Supp. Fig10A-B, Supp. Fig10C, Supp. Fig10D-E, Supp. Fig10F-G, Supp. Fig10H-K, Supp Fig. 13B, Supp Fig. 15A]
